# Supplementary figures and images for: Identification of Uncultured Bacterial Species from Firmicutes, Bacteroidetes and CANDIDATUS Saccharibacteria as Candidate Cellulose Utilizers from the Rumen of Beef Cows
Source: MDPI journal article supplement (doi:10.3390/microorganisms6010017), 2018-02-24

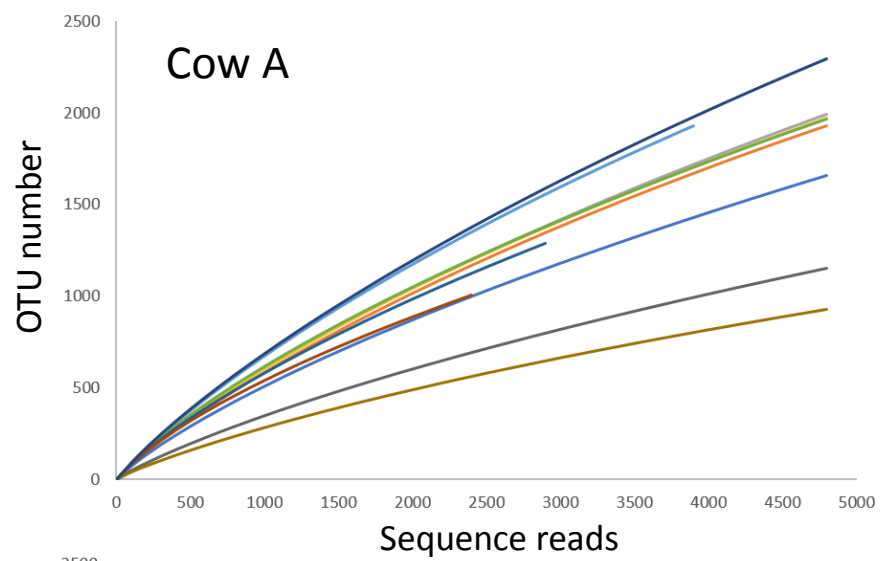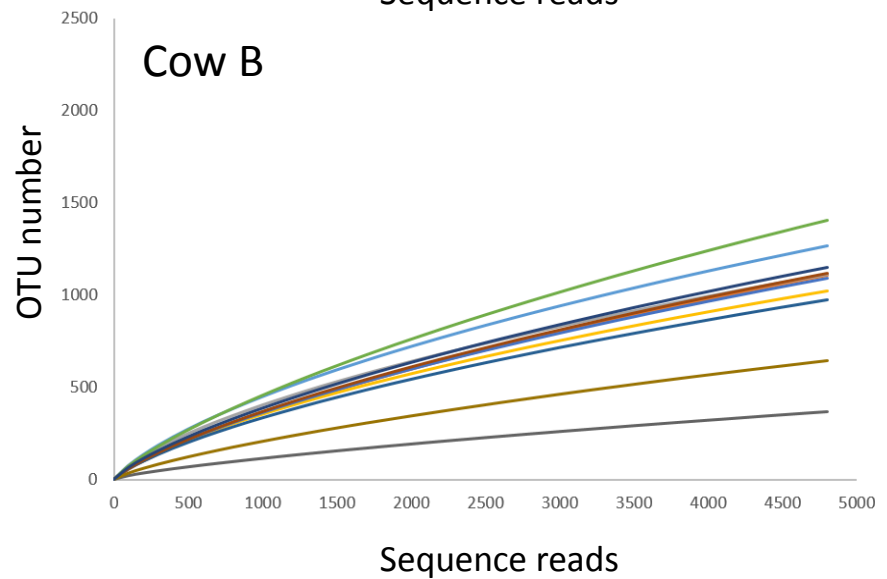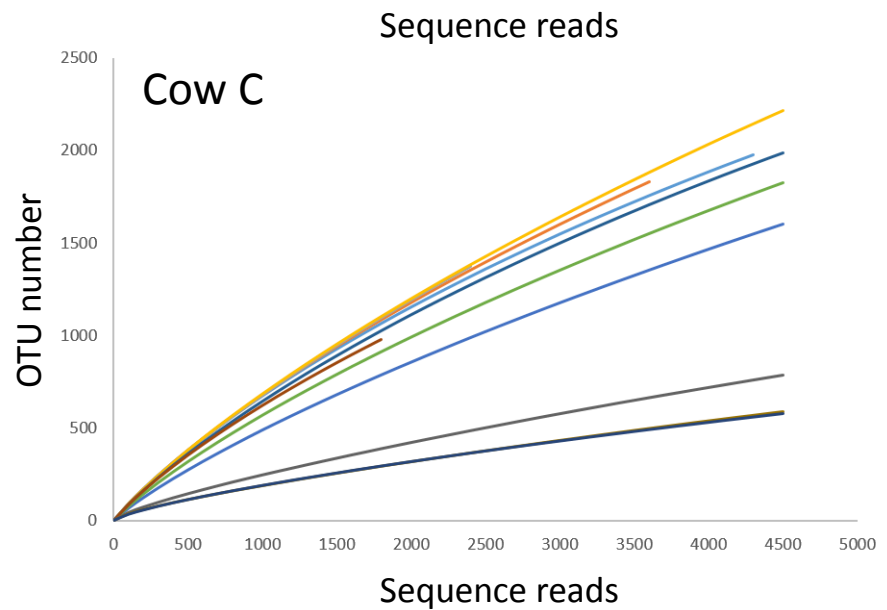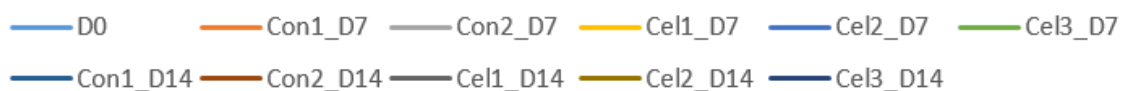

**Figure S1.** Rarefaction analysis of sequence read coverage for each sample

Supplement: s1 [file s1]
